# Supplementary material for: Lifespan-Extending Effects of Royal Jelly and Its Related Substances on the Nematode Caenorhabditis elegans
Source: PLoS One. 2011 Aug 9;6(8):e23527. doi: 10.1371/journal.pone.0023527 (PMC3153499; doi:10.1371/journal.pone.0023527)
Supplement: Table S3 — Effects of 10-HDA and/or pRJ-Fr.5 on the lifespan. (XLSX) [file pone.0023527.s006.xlsx]

## Sheet: Sheet1
Table S3	Effects of 10-HDA and/or pRJ-Fr.5 on the life span
Exp	Genotype	Treatment	Mean life span	% Change	75th percentile	% Change	Maximum life span	% Change	N (animal)	Significance
			± SEM (days)		(days)		(days)
1	N2	Control (DMSO)	26.7±0.2		28		34		2(319)	*
	N2	10-HDA 3 µM	27.3±0.2	+2	29	+4	33	-3	2(126)	NS
	N2	10-HDA 10 µM	28.4±0.3	+6	30	+7	36	+6	2(161)	p<0.001
	N2	10-HDA 50 µM	29.3±0.3	+10	31	+11	41	+21	2(163)	p<0.001
	daf-16(mu86)	Control (DMSO)	18.3±0.2		19		26		2(116)	*
	daf-16(mu86)	10-HDA 50 µM	21.1±0.3	+15	23	+21	29	+12	2(82)	p<0.001
2	N2	Control (DMSO)	28.4±0.2		29		37		2(164)	*
	N2	10-HDA 10 µM	30.0±0.3	+6	31	+7	39	+5	2(151)	p<0.001
	N2	10-HDA 25 µM	31.8±0.3	+12	34	+17	42	+14	2(173)	p<0.001
	N2	10-HDA 50 µM	31.0±0.3	+9	33	+14	42	+14	2(153)	p<0.001
	N2	10-HDA 100 µM	30.6±0.3	+8	31	+7	40	+8	2(162)	p<0.001
	daf-16(mu86)	Control (DMSO)	18.1±0.2		18		26		2(119)	*
	daf-16(mu86)	10-HDA 10 µM	19.1±0.3	+6	19	+6	26	0	2(138)	p<0.001
	daf-16(mu86)	10-HDA 25 µM	20.3±0.3	+12	21	+17	28	+8	2(123)	p<0.001
	daf-16(mu86)	10-HDA 50 µM	19.9±0.3	+10	20	+11	28	+8	2(132)	p<0.001
3	N2	Control (DMSO)	27.0±0.3		28		35		2(138)
	N2	pRJ-Fr.5 25 µg/ml	31.8±0.3	+17	34	+21	40	+14	2(136)	p<0.001
	N2	10-HDA 25 µM	30.2±0.3	+12	31	+11	38	+9	2(126)	p<0.001
	N2	pRJ-Fr.5 + 10-HDA	32.6±0.4	+21	35	+25	41	+17	2(142)	*
